# Supplementary material
Source: publisher figshare collection journal article supplement (https://karger.figshare.com/ndownloader/files/21827628)
Supplement: Supplementary file 1 [file 21827628]

**High phosphate diet improved the skeletal development of *Fam20C*-deficient mice**

Hua Zhang*, Lili Li, Yongbo Lu, Chunlin Qin

Department of Biomedical Sciences, Texas A&M University College of Dentistry, Dallas, TX 75246, USA

**Supplemental Materials and Methods**

The *Sox2-Cre;Fam20Cfl/fl* conditional knockout (cKO) miceandthe age and gender-matched *Fam20Cfl/+* or *Fam20Cfl/fl* control mice were fed with either regular diet or high-phosphate diet for 4-weeks from postnatal 3 weeks of age and sacrificed at postnatal 7 weeks for characterization. The long bones dissected from the mice of all groups were imaged with a Faxitron MX-20 Specimen Radiography System with a digital camera attached (Faxitron X-ray Corp., Buffalo Grove, IL).

**Supplemental Fig. 1. Plain X-ray Radiography of the mouse femurs and tibiae.** High Pi diet started at postnatal 3 weeks and the samples were collected at postnatal 7 weeks. 4-week high phosphate diet improved cKOmouse long bone development. Scale bar: 1 mm.
